# Supplementary material for: Comparative Studies on the Physicochemical and Volatile Flavour Properties of Traditional Deep Fried and Circulating-Air Fried Hairtail (Trichiurus lepturus)
Source: MDPI journal article supplement (doi:10.3390/foods11172710), 2022-09-05
Supplement: s1 [file s1]

**Table S1.** Criteria for sensory evaluation.

| Project.              | Standard description                                                                                                    | Score |
|-----------------------|-------------------------------------------------------------------------------------------------------------------------|-------|
| Color                 | Red brown or burnt yellow in color, well-distributed                                                                    | 8-10  |
|                       | Light yellow in color, less well-distributed                                                                            | 5-7   |
|                       | The color is light and not distributed enough                                                                           | 1-4   |
| Tissue                | The fish is firm and crispy and complete                                                                                | 8-10  |
|                       | The fish is less firm, brittle and less damaged                                                                         | 5-7   |
|                       | Fish is loose, not crisp and badly damaged                                                                              | 1-4   |
| Odor                  | the characteristic flavor of fried hairtail and no peculiar smell                                                       | 8-10  |
|                       | characteristics of slightly worse flavor of fried hairtail, slightly fishy smell, slightly burnt, bitter and other odor | 5-7   |
|                       | no fried hairtail flavor, fishy heavy, burnt, bitter and other heavy                                                    | 1-4   |
| Taste                 | tender, soft and hard, and chewy                                                                                        | 8-10  |
|                       | more tender, soft or hard, and not chewy enough                                                                         | 5-7   |
|                       | rough, too soft or too hard, and not chewy                                                                              | 1-4   |
| Overall Acceptability | Easy to accept                                                                                                          | 8-10  |
|                       | Can be accept                                                                                                           | 5-7   |
|                       | unacceptable                                                                                                            | 1-4   |

**Table S2.** Fatty acid content of fish under different frying conditions. g/100g.

|      | Fatty acid  | Raw                        | DF hairtail                | AF hairtail                |
|------|-------------|----------------------------|----------------------------|----------------------------|
| SFA  | C14:0       | 0.0045±0.0016 <sup>b</sup> | 0.0190±0.0019 <sup>a</sup> | 0.0094±0.0023 <sup>b</sup> |
|      | C15:0       | 0.0013±0.0002 <sup>a</sup> | 0.0030±0.0001 <sup>a</sup> | 0.0009±0.0000 <sup>a</sup> |
|      | C16:0       | 0.0779±0.0120 <sup>c</sup> | 1.9863±0.0209 <sup>a</sup> | 0.1645±0.0139 <sup>b</sup> |
|      | C17:0       | 0.0019±0.0006 <sup>c</sup> | 0.0213±0.0002 <sup>a</sup> | 0.0053±0.0010 <sup>b</sup> |
|      | C18:0       | 0.0375±0.0062 <sup>c</sup> | 0.9066±0.0093 <sup>a</sup> | 0.0878±0.0107 <sup>b</sup> |
|      | C20:0       | -                          | 0.0834±0.0010              | -                          |
|      | C22:0       | 0.0016±0.0006 <sup>b</sup> | 0.0977±0.0010 <sup>a</sup> | 0.0018±0.0000 <sup>b</sup> |
|      | C23:0       | -                          | 0.0117±0.0000              | -                          |
|      | C24:0       | 0.0015±0.0003 <sup>b</sup> | 0.0425±0.0009 <sup>a</sup> | 0.0038±0.0003 <sup>b</sup> |
| MUFA | C16:1       | 0.0051±0.0004 <sup>c</sup> | 0.0222±0.0011 <sup>a</sup> | 0.0118±0.0016 <sup>b</sup> |
|      | C18:1n9c    | 0.0700±0.0232 <sup>b</sup> | 4.0265±0.0215 <sup>a</sup> | 0.1132±0.0106 <sup>b</sup> |
|      | C20:1       | 0.0035±0.0006 <sup>b</sup> | 0.0376±0.0001 <sup>a</sup> | 0.0086±0.0024 <sup>b</sup> |
|      | C22:1n9     | 0.0121±0.0006 <sup>b</sup> | 0.0287±0.0016 <sup>a</sup> | 0.0358±0.0026 <sup>a</sup> |
|      | C24:1       | 0.0067±0.0007 <sup>b</sup> | 0.0180±0.0001 <sup>a</sup> | 0.0186±0.0028 <sup>a</sup> |
| PUFA | C18:2n6c    | 0.0761±0.0457 <sup>b</sup> | 8.2726±0.0554 <sup>a</sup> | 0.0300±0.0149 <sup>b</sup> |
|      | C18:3n3     | 0.0091±0.0051 <sup>b</sup> | 0.8587±0.0084 <sup>a</sup> | 0.0101±0.0018 <sup>b</sup> |
|      | C20:2       | 0.0011±0.0000 <sup>c</sup> | 0.0104±0.0000 <sup>a</sup> | 0.0031±0.0006 <sup>b</sup> |
|      | C20:3n3     | 0.0019±0.0006 <sup>a</sup> | 0.0027±0.0005 <sup>a</sup> | 0.0066±0.0039 <sup>a</sup> |
|      | C20:4n6     | 0.0216±0.0012 <sup>a</sup> | 0.0256±0.0016 <sup>a</sup> | 0.0247±0.0042 <sup>a</sup> |
|      | EPA C20:5n3 | 0.0121±0.0011 <sup>b</sup> | 0.0223±0.0032 <sup>a</sup> | 0.0297±0.0011 <sup>a</sup> |
|      | DHA C22:6n3 | 0.0918±0.0066 <sup>c</sup> | 0.1813±0.0034 <sup>b</sup> | 0.2585±0.0153 <sup>a</sup> |

The different letters in the same column represent a significant difference with  $p < 0.05$  among each group.
